# Supplementary material
Source: PubMed Central journal article supplement (PMC1636543)

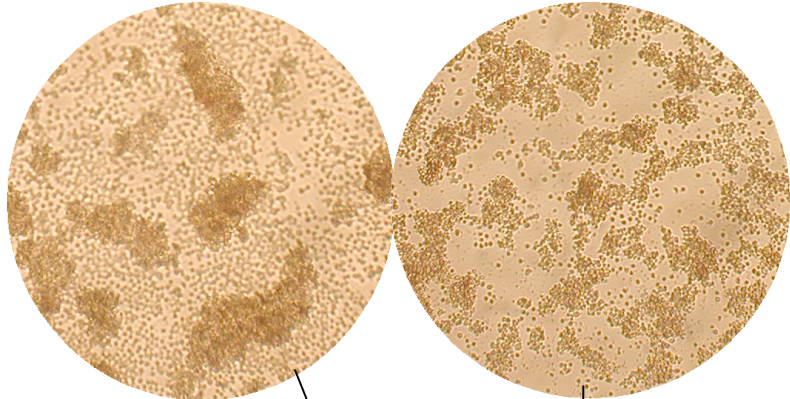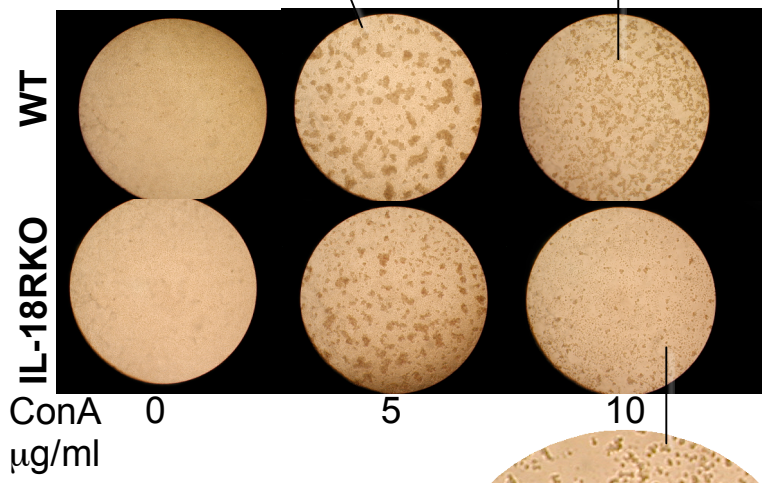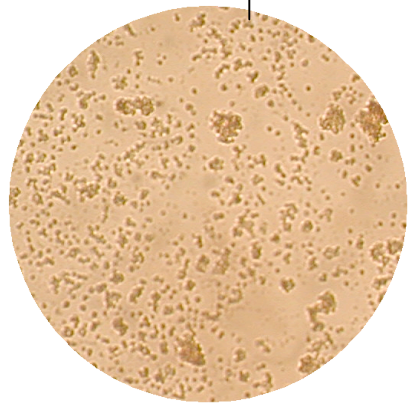

Supplement: pnas_0607917103_1.pdf [file pnas_0607917103_1.pdf]

CT

antiCD3

WT

IL-18KO

IL-18RKO

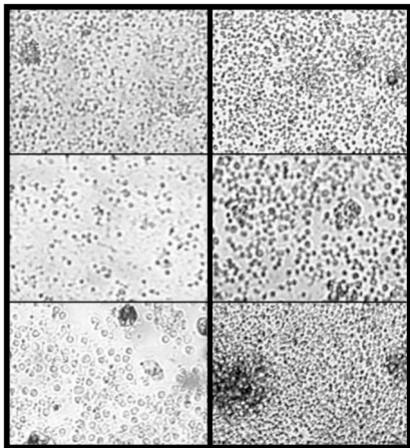

Supplement: pnas_0607917103_2.pdf [file pnas_0607917103_2.pdf]
